# Supplementary material
Source: bioRxiv or medRxiv preprint supplement (https://medrxiv.org/highwire/filestream/69983/field_highwire_adjunct_files/0/19011312-1.pdf)
Supplement: Supplementary file [file 19011312-1.pdf]

# The Effect of Altered Neural Inputs and Botulinum Neurotoxin Chemical Denervation on the Passive Biomechanical Properties of Hand and Wrist Muscles in Chronic Hemiparetic Stroke: Supplemental Material

Benjamin I Binder-Markey<sup>1,2,3,4</sup>, Wendy M Murray<sup>1,2,3,4,5</sup>, Julius P.A. Dewald<sup>1,2,3</sup>

<sup>1</sup>Department of Biomedical Engineering, Northwestern University, Evanston, IL

<sup>2</sup>Department of Physical Therapy and Human Movement Sciences, Northwestern University, Chicago, IL

<sup>3</sup>Department of Physical Medicine and Rehabilitation Science, Northwestern University, Chicago, IL

<sup>4</sup>Shirley Ryan AbilityLab, Chicago, IL

<sup>5</sup> Research Service, Edward Hines Jr., VA Hospital, Hines, I

## Examples of motor neuron hyperactivity reduction during static stretching prior to data collection

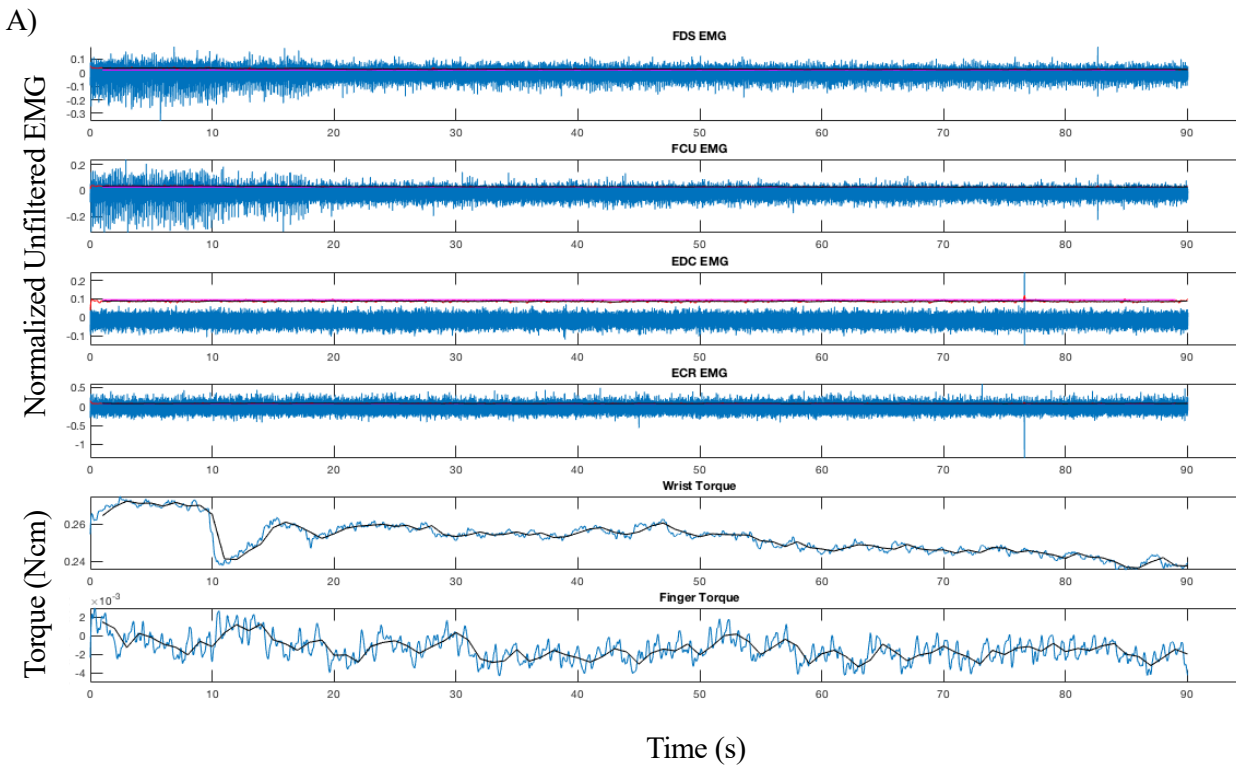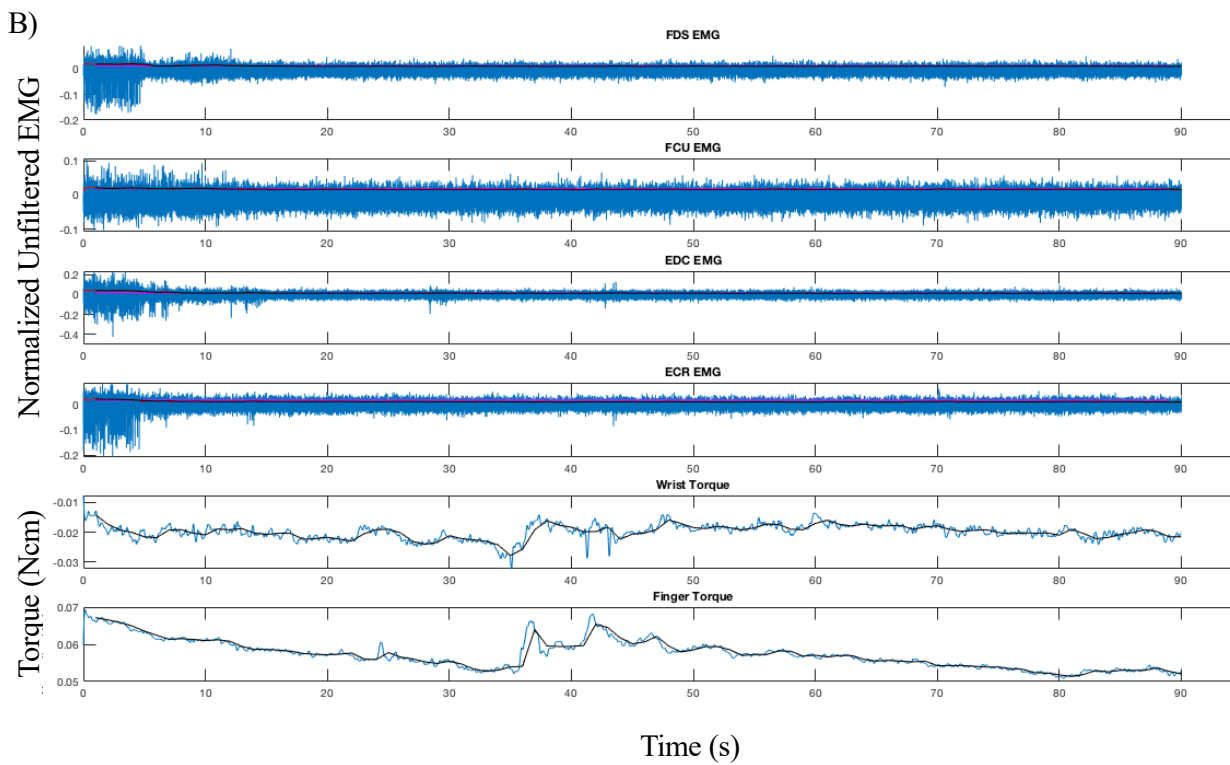

Supplemental Figure 1: Representative plots from two separate individuals of the EMG and torque traces over 90 seconds throughout one of the initial stretches within the device accommodating the participant to the device and reducing motor neuron hyperactivity. Displayed is the raw unfiltered data (blue lines), rectified and filtered EMG (red lines), processed 1 second binned data (black lines), and EMG threshold cutoff for active muscle (magenta lines). Though the participant was “relaxed” at the beginning of each stretch there is significant EMG activity at the beginning of each trial with subsequent EMG and torque reduction within each of the examples. Within Example A, FDS and FCU EMG are initially firing at a low level with activity decreasing and a corresponding decrease in wrist torque that continues throughout the trial. Within Example B EMG activity is reducing across all muscles with a corresponding decrease in finger and wrist torque that continues throughout the trial.

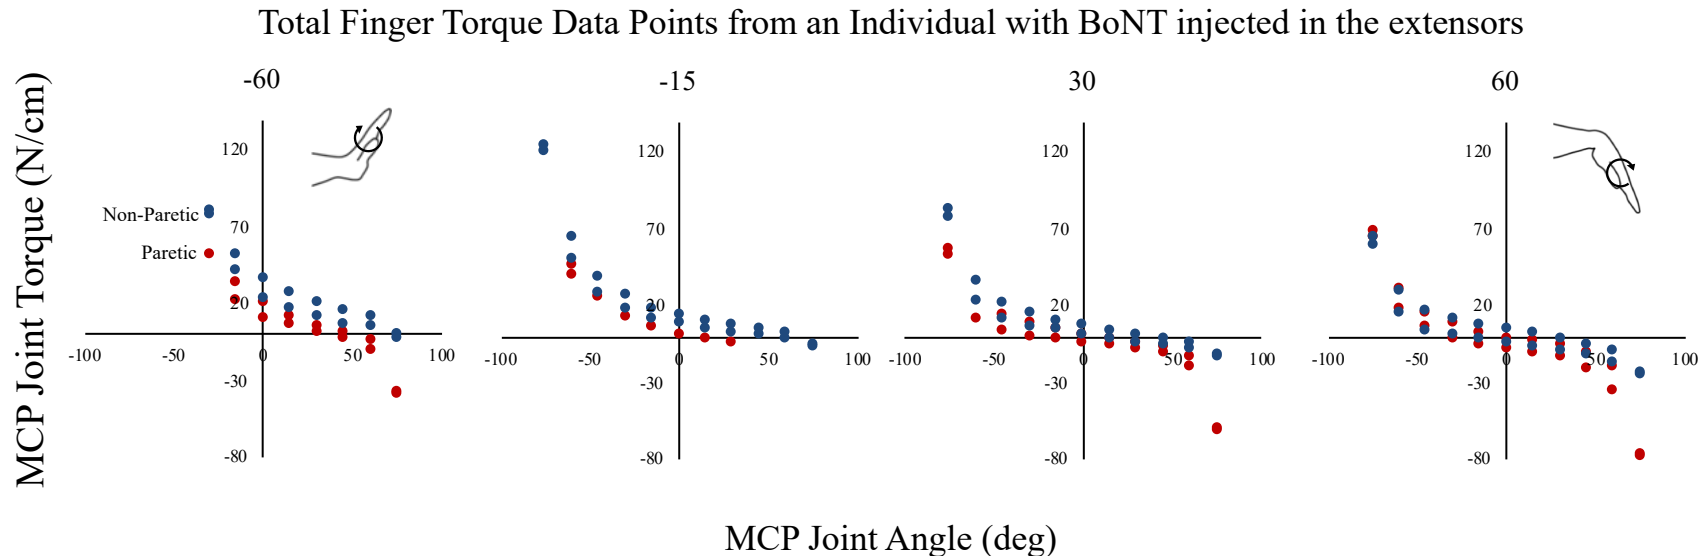

Supplemental Figure 2: Metacarpophalangeal (MCP) torque data over the MCP joints' range of motion with the wrist locked in -60, -15, 30, and 60 degrees of flexion of the paretic (red) and non-paretic (blue) limbs of the individual who had BoNT-injected into their forearm extensor muscles. Note the increase in passive extension torque as the wrist and fingers are flexed stretching the extensor muscles that were injected with BoNT. This increase in passive extension torque in flexion is not observed in any of the other groups.
